# Supplementary material for: Protein Diet Restriction Slows Chronic Kidney Disease Progression in Non-Diabetic and in Type 1 Diabetic Patients, but Not in Type 2 Diabetic Patients: A Meta-Analysis of Randomized Controlled Trials Using Glomerular Filtration Rate as a Surrogate
Source: PLOS journal article supplement (doi:10.1371/journal.pone.0145505), 2015-12-28

## Flowchart for study selection from MEDLINE database

Date: 24/09/2014

### Search performed:

("protein diet"[All Fields] OR "diet, protein"[All Fields] OR "intake, protein"[All Fields]) AND ("renal"[All Fields] OR "kidney function"[All Fields] OR "gfr"[All Fields] OR "glomerular filtration rate"[All Fields]) AND (Randomized Controlled Trial[ptyp] AND "humans"[MeSH Terms])

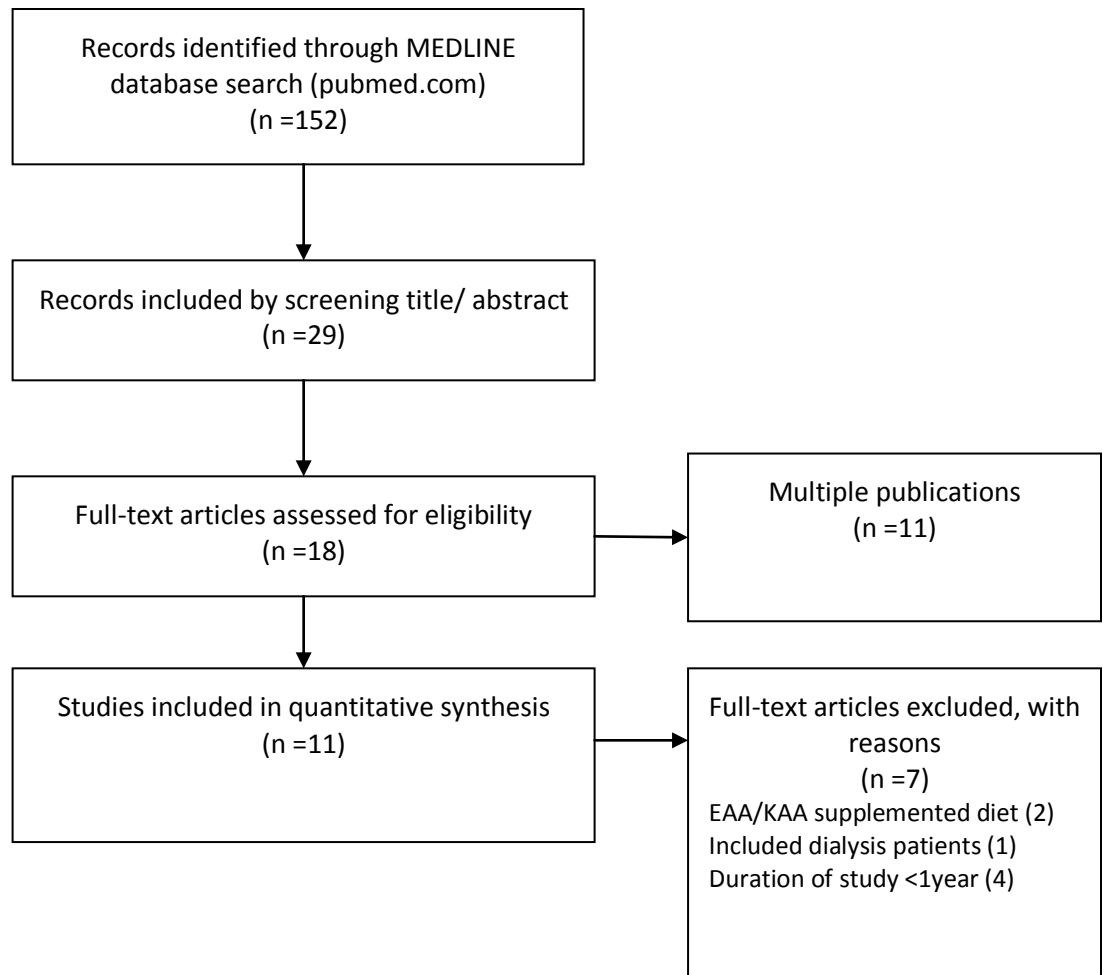

Supplement: S3 (10.1371/journal.pone.0145505.s003) [file journal.pone.0145505.s003]
